# Supplementary material for: Surface enhanced spectroscopic investigations of adsorption of cations on electrochemical interfaces
Source: Royal Society of Chemistry journal article supplement (doi:10.1039/c6cp07207k), 2016-12-08
Supplement: c6cp07207k1.pdf [file c6cp07207k1.pdf]

*Supplementary information for*

**Surface Enhanced Spectroscopic Investigations of Impact of Cations on Electrochemical  
Interfaces**

**Authors:** Marco Dunwell<sup>a</sup>, Junhua Wang,<sup>a</sup> Yushan Yan<sup>a,\*</sup>, Bingjun Xu<sup>a,\*</sup>

<sup>a</sup>Center for Catalytic Science and Technology, Department of Chemical and Biomolecular  
Engineering, University of Delaware, Newark, DE 19716, USA.

\*Correspondence to: [yanys@udel.edu](mailto:yanys@udel.edu) and [bxu@udel.edu](mailto:bxu@udel.edu)

## Materials and Methods

**Pt and Au film electrode preparation.** Pt film electrodes on top of a thin Pd underlayer were prepared using an electroless chemical plating method on an undoped Si prism using a modified deposition procedure outlined by Miki et. al.<sup>1, 2</sup> The Si prism was first polished using 0.05  $\mu\text{m}$  alumina slurry, then rinsed using double deionized-distilled water (Barnstead Mega-Pure Water Purification System) and acetone successively to remove alumina residue. Following cleaning, a Pd seed layer was then deposited directly on the reflecting plane of the Si prism in order to improve adhesion of the Pt overlayer.<sup>3</sup> The Pd deposition solution consisted of 0.23 mM  $\text{PdCl}_2$  (99.999%, Alfa Aesar) + 0.014 M HCl (36.5-38% HCl, Fischer Scientific) + 0.28 M HF (48%, 99.99% metals basis, Sigma Aldrich) + 0.76 M  $\text{NH}_4\text{F}$  (40%, Fluka) in distilled water. The reflecting plane of the Si crystal was first immersed in 40%  $\text{NH}_4\text{F}$  for 1 min and 45 s in order to create a hydrogen-terminated Si surface. The crystal was then immersed in a room temperature Pd plating solution for 6 min to deposit the Pd seed layer. The Si crystal is then rinsed with distilled water and dried using air. The Pd-seeded Si prism was then sintered at 200 °C for 30 min in a vacuum evacuated tube furnace. After sintering, the Si prism was rinsed and the Pd-seeded reflecting plane of the prism was immersed in the Pt plating solution at 60 °C for ~2 min. The Pt plating solution consisted of two separate solutions. The first solution, containing the Pt salt, is 0.01 M  $\text{H}_2\text{PtCl}_6 \cdot 6\text{H}_2\text{O}$  (Sigma Aldrich). The second solution, used to adjust solution pH and stabilize the Pt mixture, is 0.3 M  $\text{NH}_3$  (30%, Fischer Scientific) + 0.036 M  $\text{HONH}_3\text{Cl}$  (99.999%, Aldrich) + 0.04 M  $\text{N}_2\text{H}_4 \cdot \text{H}_2\text{O}$  (98%, Sigma Aldrich). The two solutions were mixed in a 1:1 (vol) ratio immediately before Pt deposition. A detailed procedure for preparation of the SEIRAS-active Au film is given in our previous work.<sup>4</sup>

**Experimental procedures.** ATR-SEIRAS experiments were conducted in a two-compartment spectroelectrochemical cell as described previously.<sup>4</sup> The working electrode was the Pt or Au films described in the previous section. A Pt wire counter electrode was used for all experiments on Pt film working electrodes, and a graphite rod was used for all experiments using an Au film working electrode in order to prevent contamination of the Au working electrode by Pt deposition from the counter electrode. A Ag/AgCl (3.0 M KCl, BASi) reference electrode was used in the working electrode compartment for all experiments. The working and counter electrode compartments were separated using a Nafion proton exchange membrane. Spectra were collected during cyclic voltammetry and potentiostatic experiments in 0.1 M LiClO<sub>4</sub> (99+%, Arcos Organics), NaClO<sub>4</sub> (99+%, Arcos Organics), KClO<sub>4</sub> (> 99.99% metals basis, Sigma Aldrich), TMAcCl (≥ 98%, Sigma Aldrich), TEACl (25% TEAOH, Alfa Aesar + 36.5-38% HCl, Fischer Scientific), TPACl (40% TPAOH, SACHEM + 36.5-38% HCl, Fischer Scientific), and TBACl (40% TBAOH, SACHEM + 36.5-38% HCl, Fischer Scientific) under continuous CO purge (Matheson). All spectroscopic and electrochemical data were collected using an Agilent Technologies Cary 660 FTIR spectrometer equipped with a liquid nitrogen-cooled MCT detector and a Pike Technologies VeeMAX II ATR accessory coupled with a Solartron SI 1260/1287 system for electrochemical measurements.

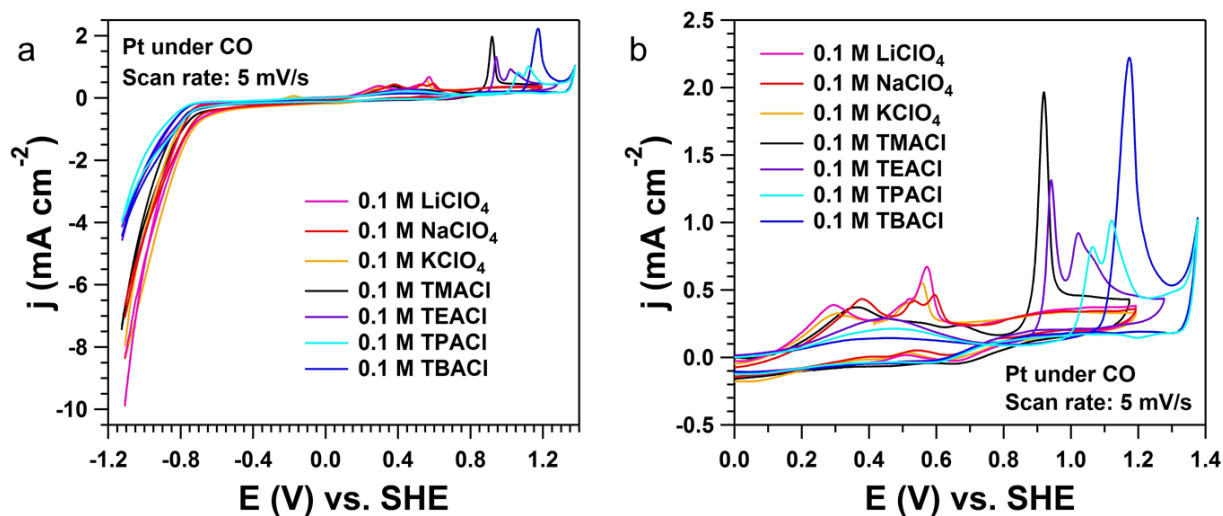

**Fig. S1** (a) Cyclic voltammograms at 5 mV s<sup>-1</sup> in 0.1 M solutions of LiClO<sub>4</sub> (pink), NaClO<sub>4</sub> (red), KClO<sub>4</sub> (orange), TMACl (black), TEACl (purple), TPACl (light blue), TBACl (blue) under continuous CO purge corresponding to the spectra in main text Fig. 1 and Figs. S4-S9. (b) Zoom of the CO oxidation region of (a). The delayed CO oxidation in the tetraalkylammonium chloride solutions is likely due to chloride poisoning of the Pt surface at high potentials.

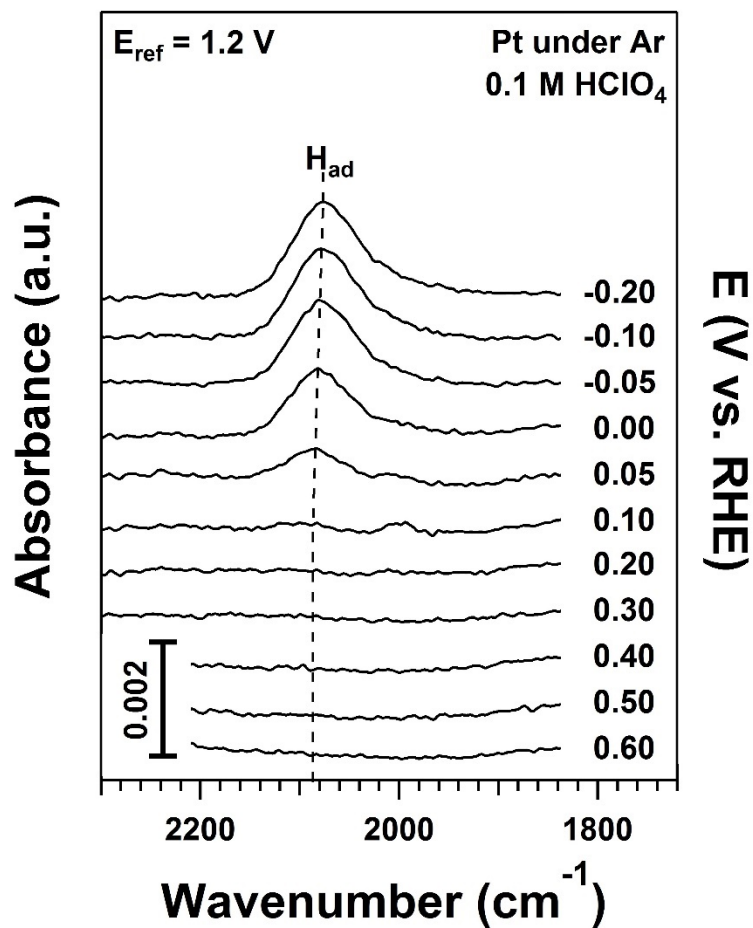

**Fig. S2** ATR-SEIRA spectra ( $4 \text{ cm}^{-1}$  resolution, 64 co-added scans) during potential steps from 0.6 V to -0.2 V on chemically deposited Pt film electrode in 0.1 M  $\text{HClO}_4$  under 1 atm Ar. Reference spectrum collected at 1.2 V vs. RHE.

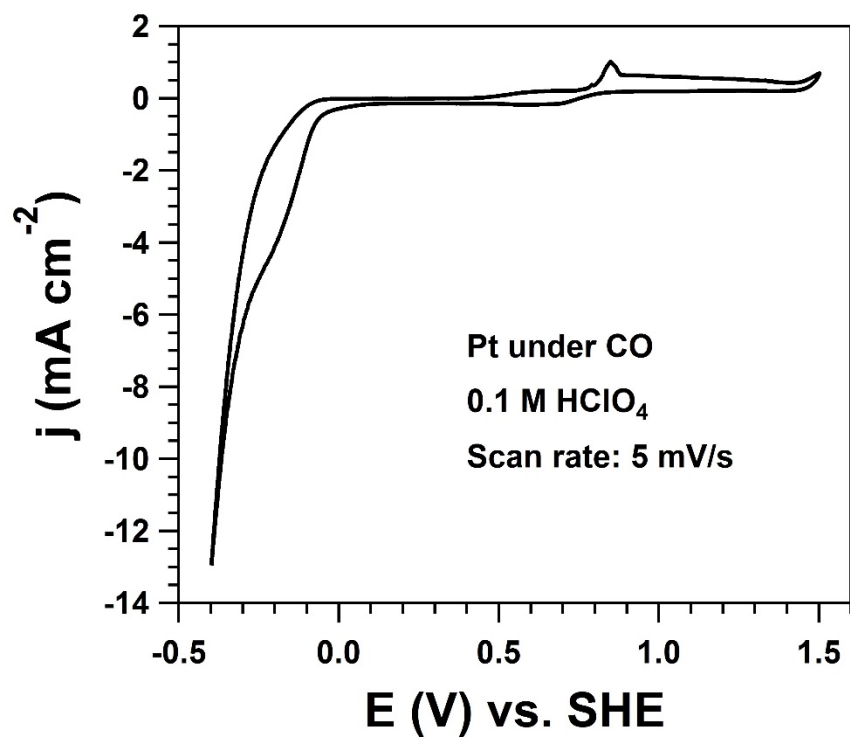

**Fig. S3** Cyclic voltammogram at 5  $\text{mV s}^{-1}$  in 0.1 M HClO<sub>4</sub> under continuous CO purge corresponding to the spectra in Fig. 3 of the main text.

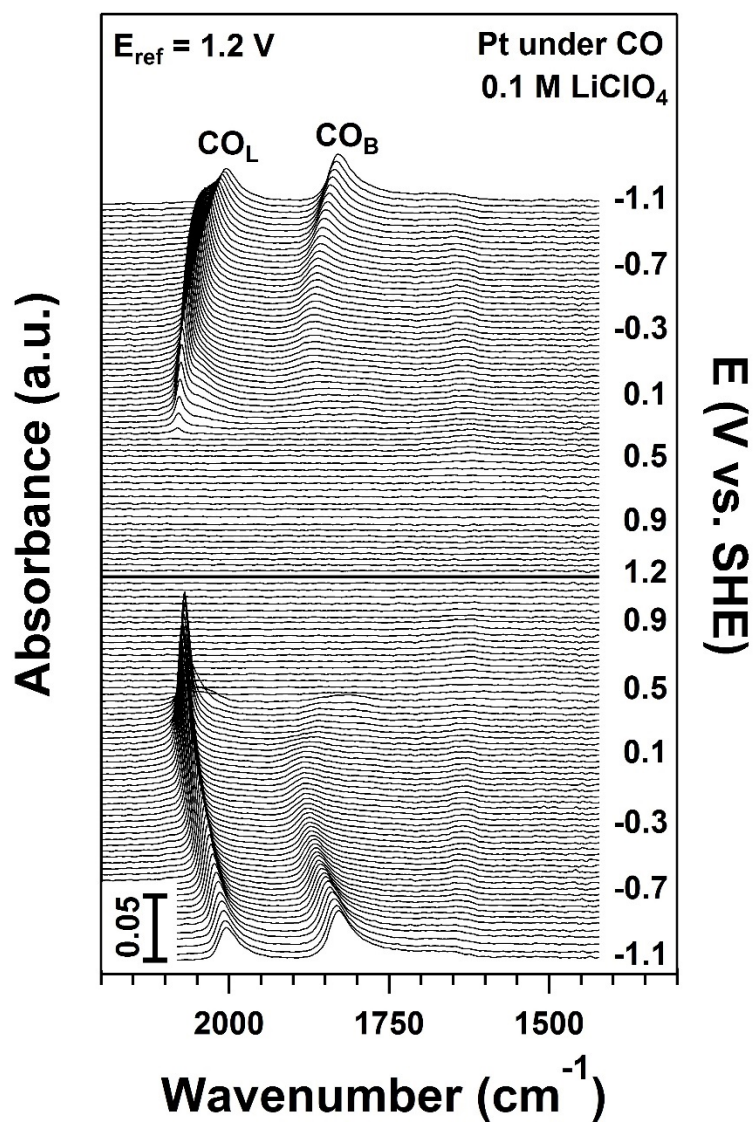

**Fig. S4** ATR-SEIRA spectra (4 cm<sup>-1</sup> resolution, 8 co-added scans) during anodic and cathodic scans from -1.1 V to 1.2 V on chemically deposited Pt film electrode in 0.1 M LiClO<sub>4</sub> under continuous CO purge during potential cycling at 5 mV s<sup>-1</sup>. Reference spectrum collected at 1.2 V. Corresponding CV is presented in Fig. S1.

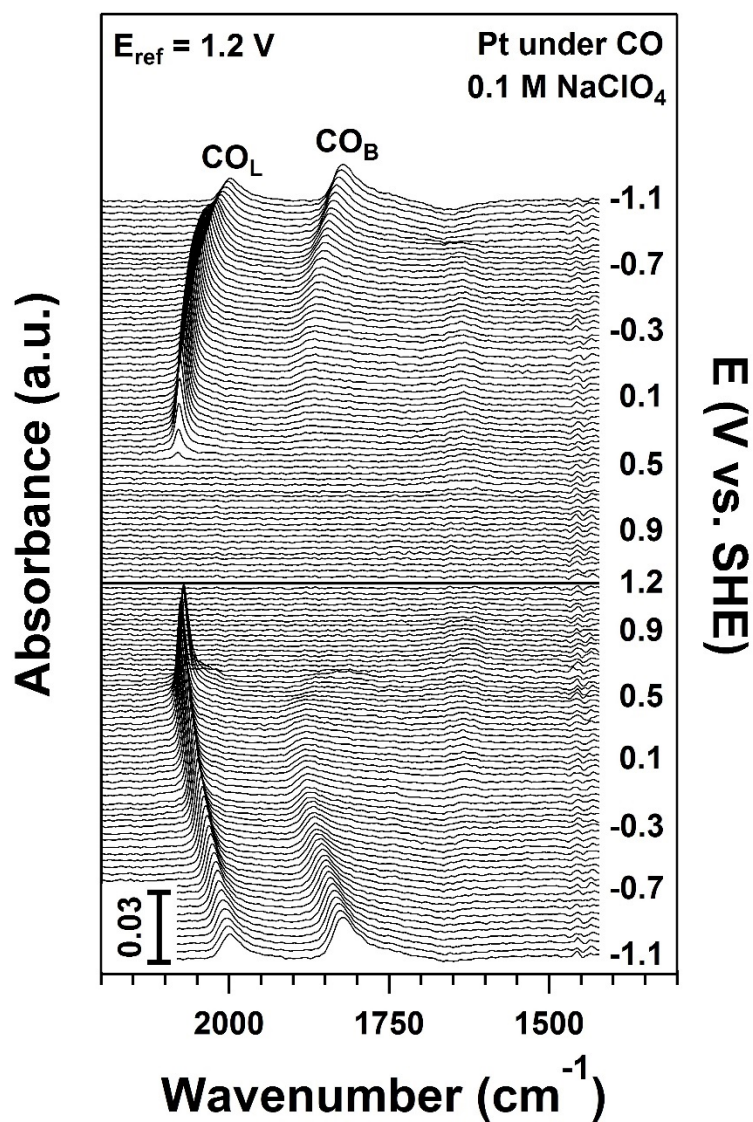

**Fig. S5** ATR-SEIRA spectra (4 cm<sup>-1</sup> resolution, 8 co-added scans) during anodic and cathodic scans from -1.1 V to 1.2 V on chemically deposited Pt film electrode in 0.1 M NaClO<sub>4</sub> under continuous CO purge during potential cycling at 5 mV s<sup>-1</sup>. Reference spectrum collected at 1.2 V. Corresponding CV is presented in Fig. S1.



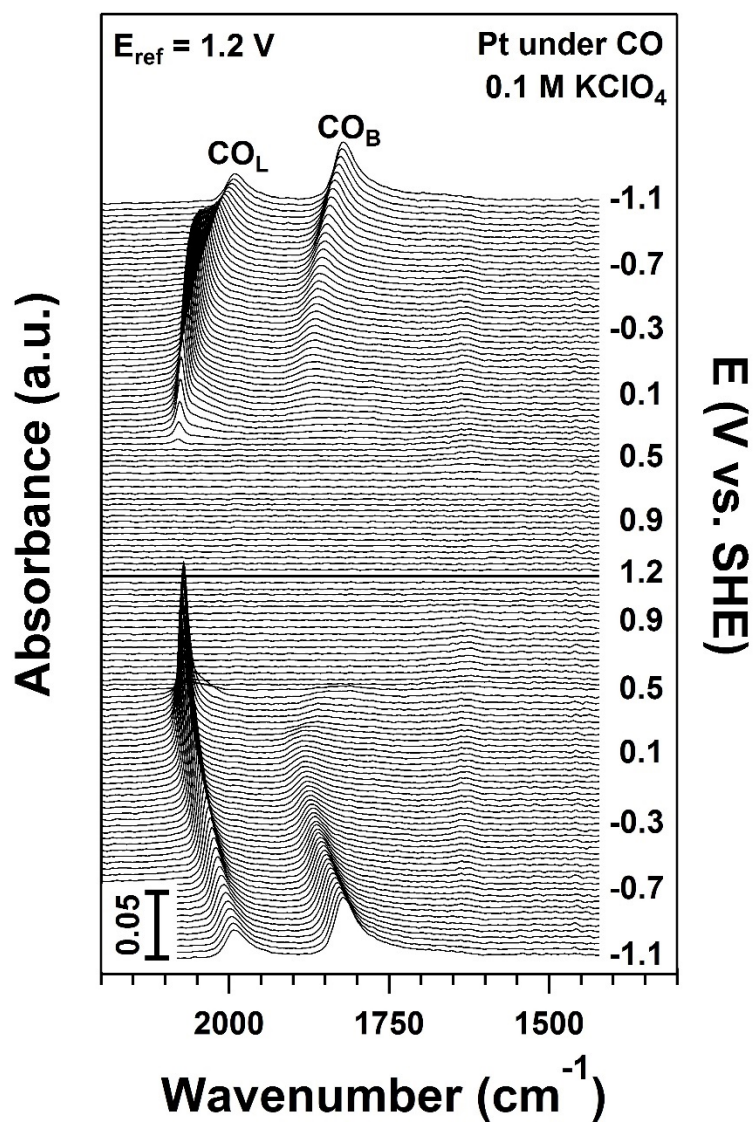

**Fig. S6** ATR-SEIRA spectra (4 cm<sup>-1</sup> resolution, 8 co-added scans) during anodic and cathodic scans from -1.1 V to 1.2 V on chemically deposited Pt film electrode in 0.1 M KClO<sub>4</sub> under continuous CO purge during potential cycling at 5 mV s<sup>-1</sup>. Reference spectrum collected at 1.2 V. Corresponding CV is presented in Fig. S1.

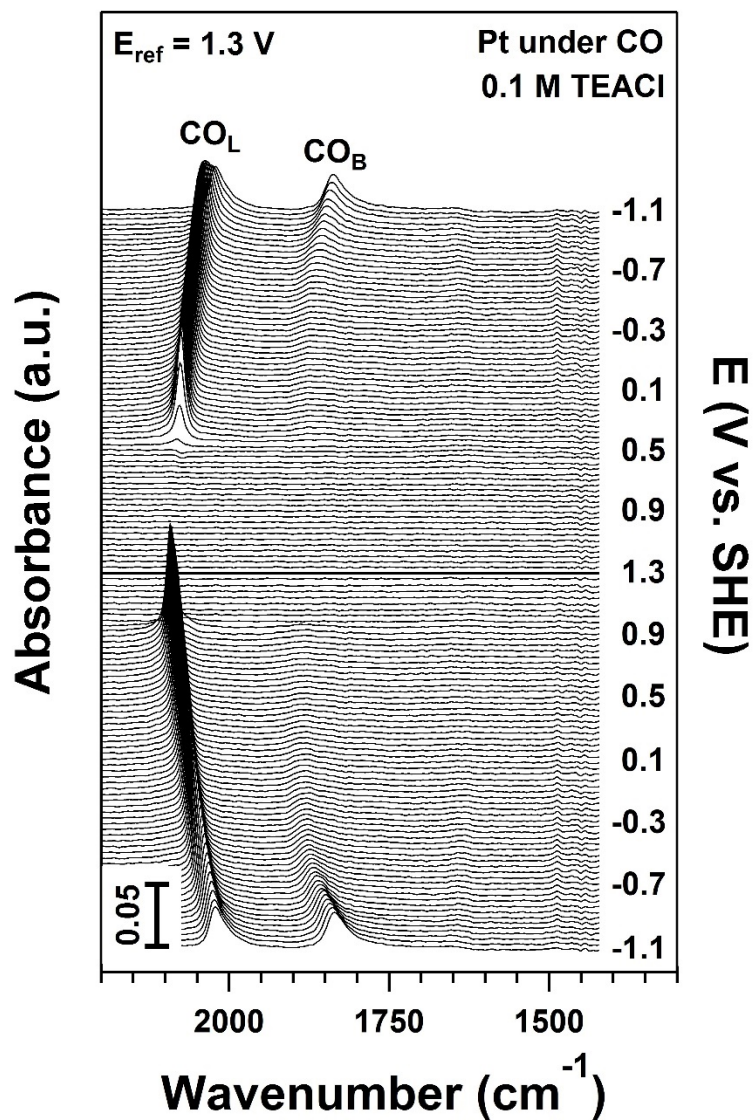

**Fig. S7** ATR-SEIRA spectra ( $4 \text{ cm}^{-1}$  resolution, 8 co-added scans) during anodic and cathodic scans from -1.1 V to 1.3 V on chemically deposited Pt film electrode in 0.1 M TEACl under continuous CO purge during potential cycling at  $5 \text{ mV s}^{-1}$ . Reference spectrum collected at 1.3 V. Corresponding CV is presented in Fig. S1.

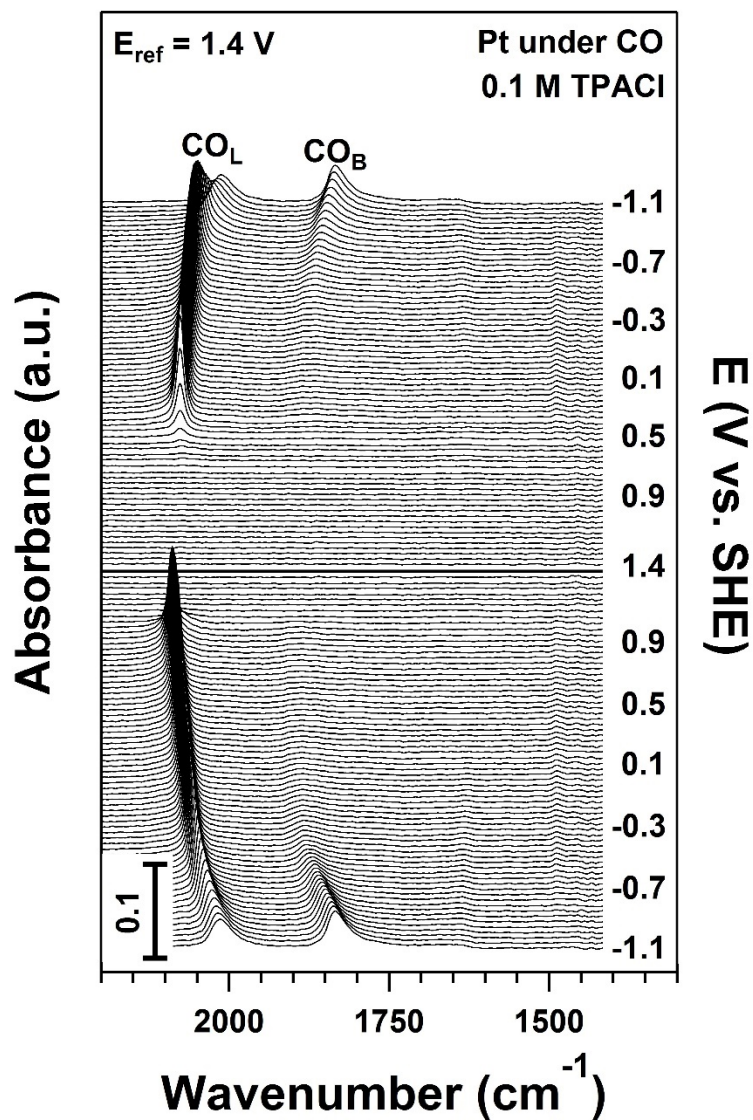

**Fig. S8** ATR-SEIRA spectra ( $4 \text{ cm}^{-1}$  resolution, 8 co-added scans) during anodic and cathodic scans from -1.1 V to 1.4 V on chemically deposited Pt film electrode in 0.1 M TPACl under continuous CO purge during potential cycling at  $5 \text{ mV s}^{-1}$ . Reference spectrum collected at 1.4 V. Corresponding CV is presented in Fig. S1.

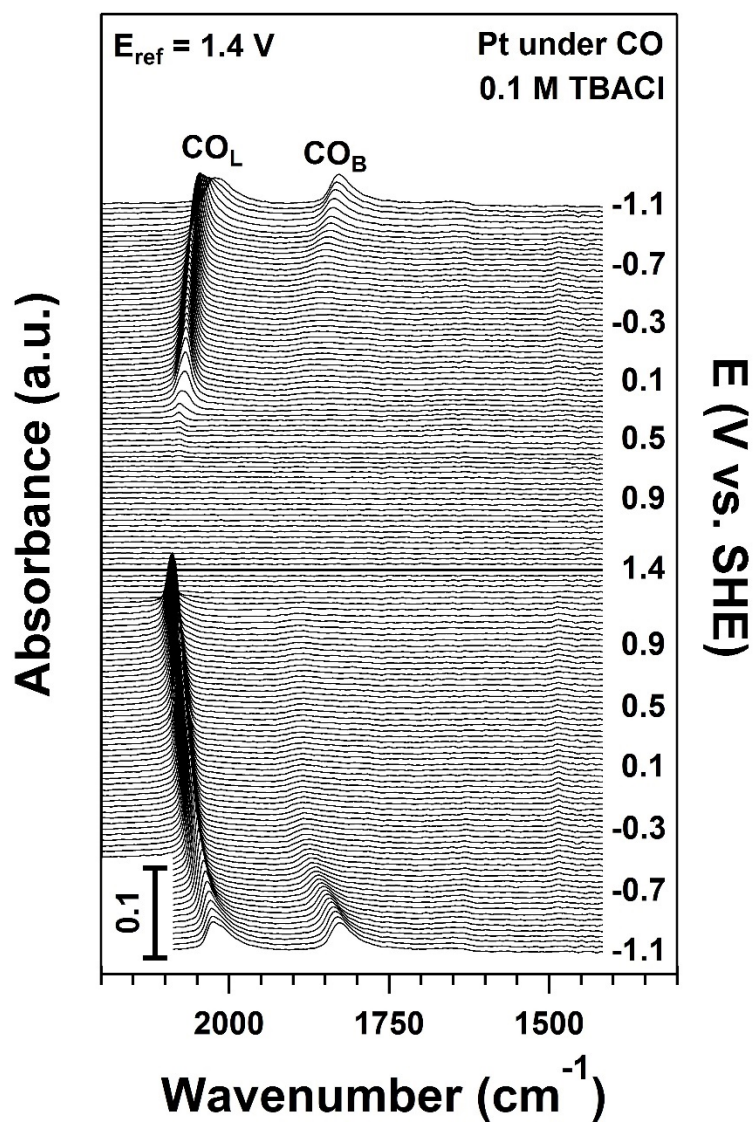

**Fig. S9** ATR-SEIRA spectra ( $4 \text{ cm}^{-1}$  resolution, 8 co-added scans) during anodic and cathodic scans from -1.1 V to 1.4 V on chemically deposited Pt film electrode in 0.1 M TBACl under continuous CO purge during potential cycling at  $5 \text{ mV s}^{-1}$ . Reference spectrum collected at 1.4 V. Corresponding CV is presented in Fig. S1.

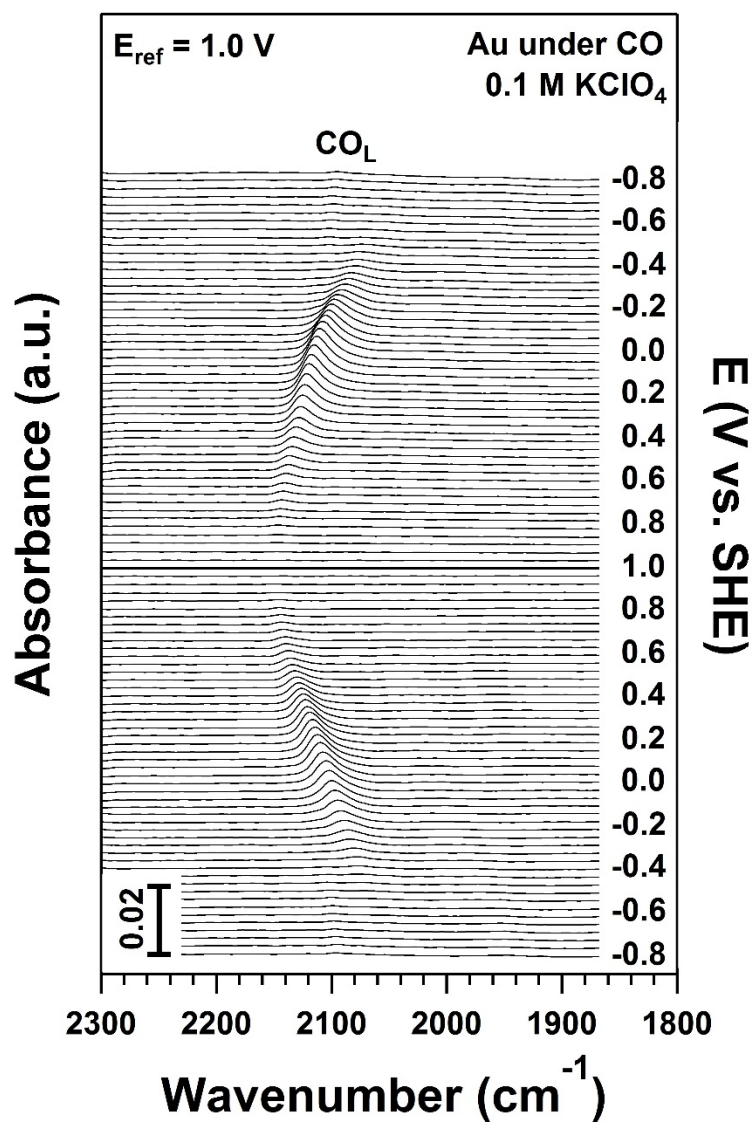

**Fig. S10** ATR-SEIRA spectra ( $4 \text{ cm}^{-1}$  resolution, 8 co-added scans) during anodic and cathodic scans at  $5 \text{ mV s}^{-1}$  from  $-0.8 \text{ V}$  to  $1.0 \text{ V}$  vs. SHE on chemically deposited Au film electrode in  $0.1 \text{ M KClO}_4$  under continuous CO purge. Reference spectrum collected at  $1.0 \text{ V}$ .

## References

1. A. Miki, S. Ye and M. Osawa, *Chemical Communications*, 2002, DOI: 10.1039/B203392E, 1500-1501.
2. A. Miki, S. Ye, T. Senzaki and M. Osawa, *Journal of Electroanalytical Chemistry*, 2004, **563**, 23-31.
3. S. Karmalkar and J. Banerjee, *Journal of The Electrochemical Society*, 1999, **146**, 580-584.
4. M. Dunwell, Y. Yan and B. Xu, *Surface Science*, 2015, DOI: <http://dx.doi.org/10.1016/j.susc.2015.12.019>.
